# Supplementary material for: Dual Antiplatelet Therapy Using Cilostazol With Aspirin or Clopidogrel: Subanalysis of the CSPS.com Trial
Source: PubMed Central journal article supplement — Stroke. 2021 Aug 18;52(11):3430–9. doi: 10.1161/STROKEAHA.121.034378 (PMC8547582; doi:10.1161/strokeaha.121.034378), 2021-08-18

## Supplemental Material

### **Dual antiplatelet therapy using cilostazol with aspirin or clopidogrel: Subanalysis of the CSPS.com trial**

Haruhiko Hoshino, MD<sup>1</sup>; Kazunori Toyoda, MD<sup>2</sup>; Katsuhiko Omae, PhD<sup>3</sup>; Noriyuki Ishida, BSN<sup>3</sup>; Shinichiro Uchiyama, MD<sup>4</sup>; Kazumi Kimura, MD<sup>5</sup>; Nobuyuki Sakai, MD<sup>6</sup>; Yasushi Okada, MD<sup>7</sup>; Kortaro Tanaka, MD<sup>8</sup>; Hideki Origasa, PhD<sup>9</sup>; Hiroaki Naritomi, MD<sup>10</sup>; Kiyohiro Houkin, MD<sup>11</sup>; Keiji Yamaguchi, MD<sup>12</sup>; Masanori Isobe, MD<sup>13</sup>; Kazuo Minematsu, MD<sup>14</sup>; Masayasu Matsumoto, MD<sup>15</sup>; Teiji Tominaga, MD<sup>16</sup>; Hidekazu Tomimoto, MD<sup>17</sup>; Yasuo Terayama, MD<sup>18</sup>; Satoshi Yasuda, MD<sup>19</sup>; Takenori Yamaguchi, MD<sup>2</sup>; on behalf of the CSPS.com Trial Investigators

## Supplemental Figure

Primary efficacy outcome of ischemic stroke in the clopidogrel group, according to prespecified subgroups

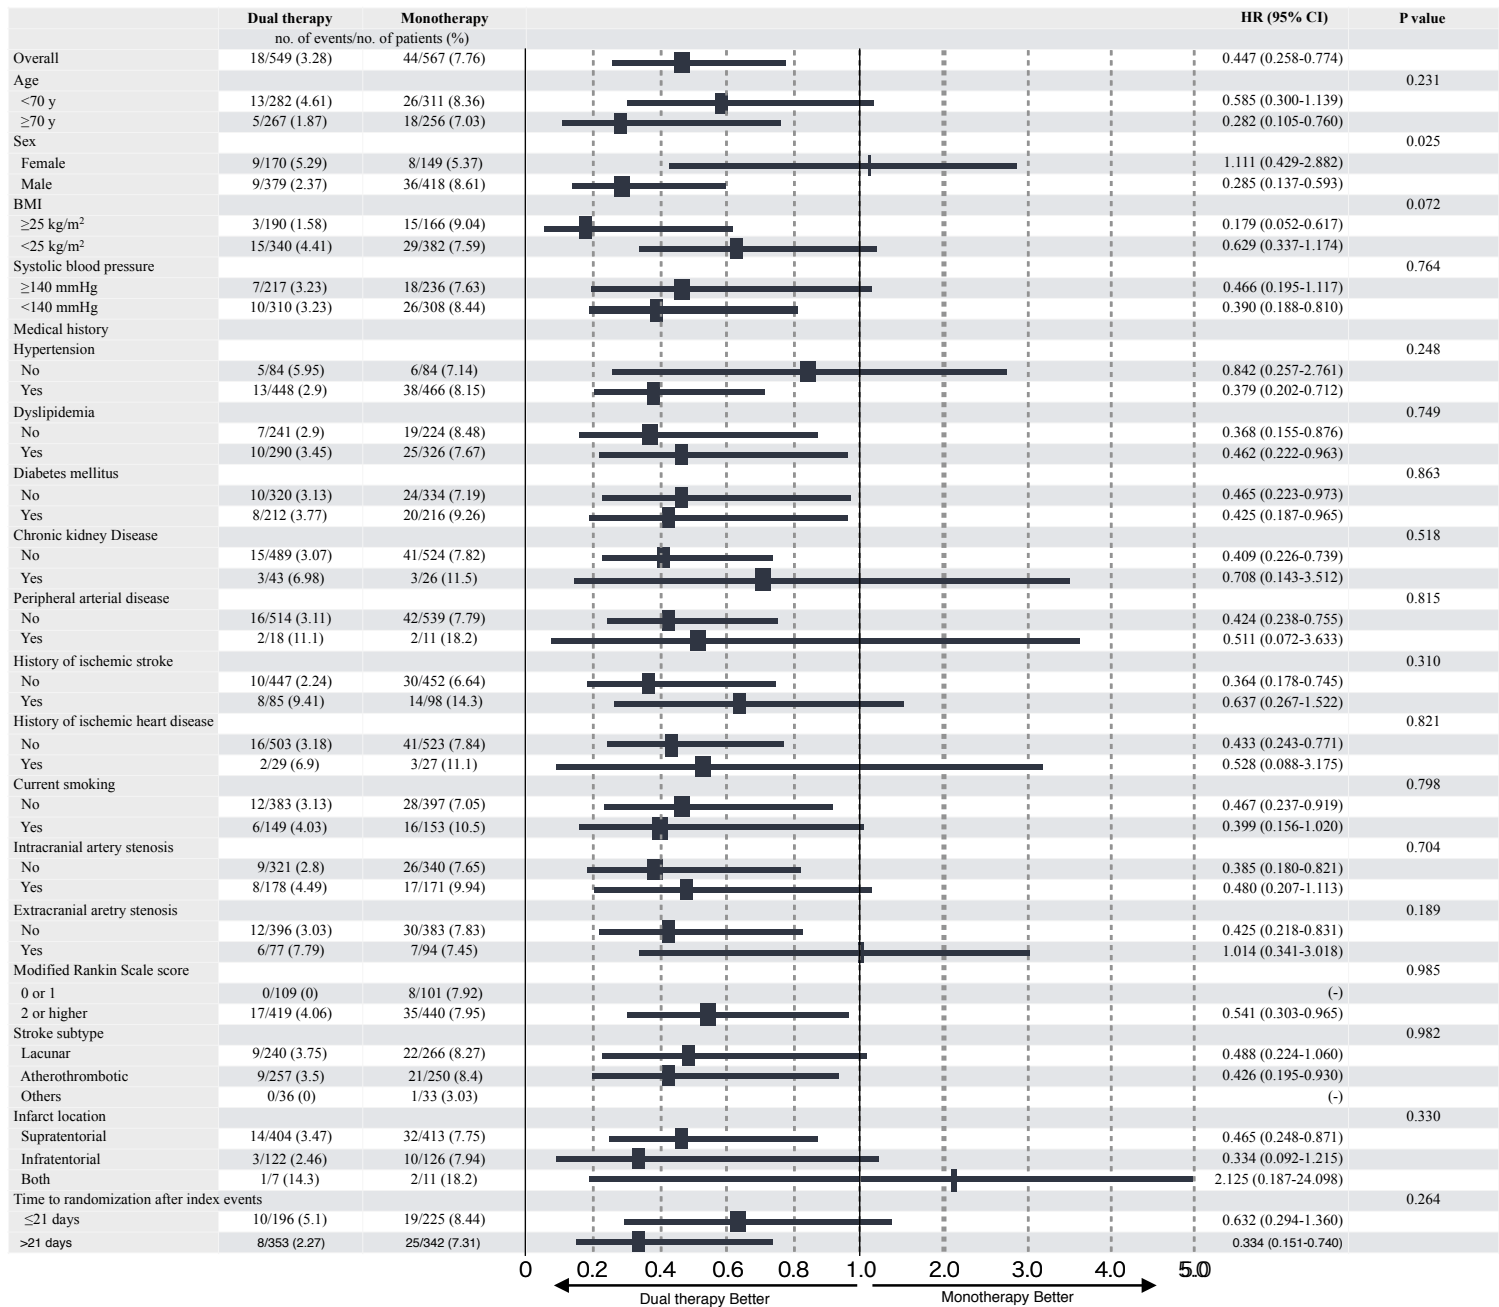

Supplement: str-52-3430-s001.pdf [file str-52-3430-s001.pdf]
